# Supplementary material
Source: PubMed Central journal article supplement (PMC2736091)
Supplement: en.2008-1817_2.pdf [file en.2008-1817_2.pdf]

Supplemental Data Tables

**SUPPLEMENTAL DATA TABLE 1.** Mutagenic oligonucleotides

| <u>Mutation/Terminal primer</u> | <u>Sense oligonucleotide</u> | <u>Antisense oligonucleotide</u> |
|---------------------------------|------------------------------|----------------------------------|
| pPGKS2                          | AAGATGCCGATTTGGGCGCGAATCC    | --                               |
| iPGKAS1                         | --                           | GCAACACCTGGCAATTCCTTACCTTCC      |
| 17βHSD1-R38K                    | GCCACGTTGAAGGACCTGAAAACACAG  | TTTCAGGTCCTTCAACGTGGCATAACAC     |
| 17βHSD1-R38G                    | GCCACGTTGGGTGACCTGAAAACACAG  | TTTCAGGTCACCCAACGTGGCATAACAC     |
| 17βHSD1-R38D                    | GCCACGTTGGATGACCTGAAAACACAG  | TTTCAGGTCATCCAACGTGGCATAACAC     |
| 17βHSD2-E116D                   | AGTTTTGAATGACAATGGCCCAGGAGC  | TGGGCCATTGTCAATCAAAACTCCGGC      |
| 17βHSD2-E116G                   | AGTTTTGAATGGAAATGGCCCAGGAGC  | TGGGCCATTTCCATTCAAAACTCCGGC      |
| 17βHSD2-E116R                   | AGTTTTGAATAGAAATGGCCCAGGAGC  | TGGGCCATTTCTATTCAAAACTCCGG       |
| 17βHSD2-E116G+N117R             | TTGAATGGAAGAGGCCAGGAGCTGAG   | TCCTGGGCCTCTTCCATTCAAAACTCC      |
| 11βHSD2-17βHSD2 chimera         | TGCCTTCTGATCCACCGGCAGGCGCTGC | CAGCGCCTGCCGGTGGATCAGAAGGCAG     |

**SUPPLEMENTAL DATA TABLE 2.** Conditions for equilibrium kinetics experiments

| <u>Medium</u>  | <u>[<sup>3</sup>H]-Estrone</u> |           | <u>[<sup>14</sup>C]-Estradiol</u> |           | <u>E1:E2 Ratio</u> |
|----------------|--------------------------------|-----------|-----------------------------------|-----------|--------------------|
|                | <u>cpm</u>                     | <u>μM</u> | <u>cpm</u>                        | <u>μM</u> |                    |
| Complete       | 1,000,000                      | 0.23      | 640,000                           | 0.93      | 20:80              |
| 2-Deoxyglucose | 600,000                        | 0.45      | 480,000                           | 0.70      | 40:60              |

**SUPPLEMENTAL DATA TABLE 3.** Representative purification of wild-type 17βHSD1 from 1 liter culture of *E coli*

| Step Of Purification | Total Volume (ml) | Protein Conc. (mg/ml) | Total Protein (mg) | Activity (U/ml) | Total Activity (U) | Specific Activity (U/mg) | Fold Purification | Yield (%) |
|----------------------|-------------------|-----------------------|--------------------|-----------------|--------------------|--------------------------|-------------------|-----------|
| Crude Extract        | 150               | 12.87                 | 1931.1             | 102.3           | 15345              | 7.9                      | 1                 | 100       |
| Heat treatment       | 310               | 0.64                  | 199.6              | 34.1            | 10570              | 52.9                     | 6.7               | 68.9      |
| Red Agarose Gel      | 10                | 1.23                  | 12.3               | 120.9           | 1209               | 98.3                     | 1.85              | 11.4      |

**SUPPLEMENTAL DATA TABLE 4.** Residues in cofactor binding regions and structural elements for 17βHSD1, 11βHSD1, and gluconate 5-dehydrogenase from x-ray structures and of 17βHSD2 and 11βHSD2 by alignment.

|         |    | LOOP1 | BETA1  | LOOP2 | ALPHA1       | LOOP3  | BETA2  | LOOP4 | ALPHA2          | LOOP5  | BETA3 | LOOP6 | ALPHA3          | Cofactor |
|---------|----|-------|--------|-------|--------------|--------|--------|-------|-----------------|--------|-------|-------|-----------------|----------|
| HSD17B1 | RX | ART   | VVLIT  | GcSS  | GIGLHLAVRLAS | DPSQSF | KVYATL | RD    | LKTQGRWLWEAARAL | ACPPGS | LETLQ | LDVRD | SKSVAAARERT     | NADP     |
| HSD17B2 | OX | DQK   | AVLVT  | GgDC  | GLGHALCKYLDE | LGF    | TVFAGV | LNENG | PGAEELRRT       | CSPRL  | SVLQ  | MDITK | PVQIKDAYSKDAAM  | NAD      |
| HSD11B1 | RX | QGK   | KAVIVT | GASK  | GIGREMAYHLAK | MGA    | HVVVTA | RS    | KETLQKVVSHCLE   | LGAAS  | AHYIA | GTMED | MTFAEQFVAQAGKL  | NADP     |
| HSD11B2 | OX | ATR   | AVLIT  | GcDS  | GFGKETAKKLD  | MGS    | TVLATV | LELNS | PGAIELRSC       | CSPR   | LRLQ  | MDLTK | PGDISRVLEFTKAHT | NAD      |
| Ga5DH2  | OX | KGK   | IALVT  | GASY  | GIGFAIASAYAK | AGA    | TIVFND | IN    | QELVDRGMAAYKA   | AGIN   | AHGTV | CDVTD | EDGIQAMVAQIESE  | NADP     |
