# Supplementary material
Source: PubMed Central journal article supplement (PMC2736091)
Supplement: en.2008-1817_3.pdf [file en.2008-1817_3.pdf]

Supplemental Data Figures

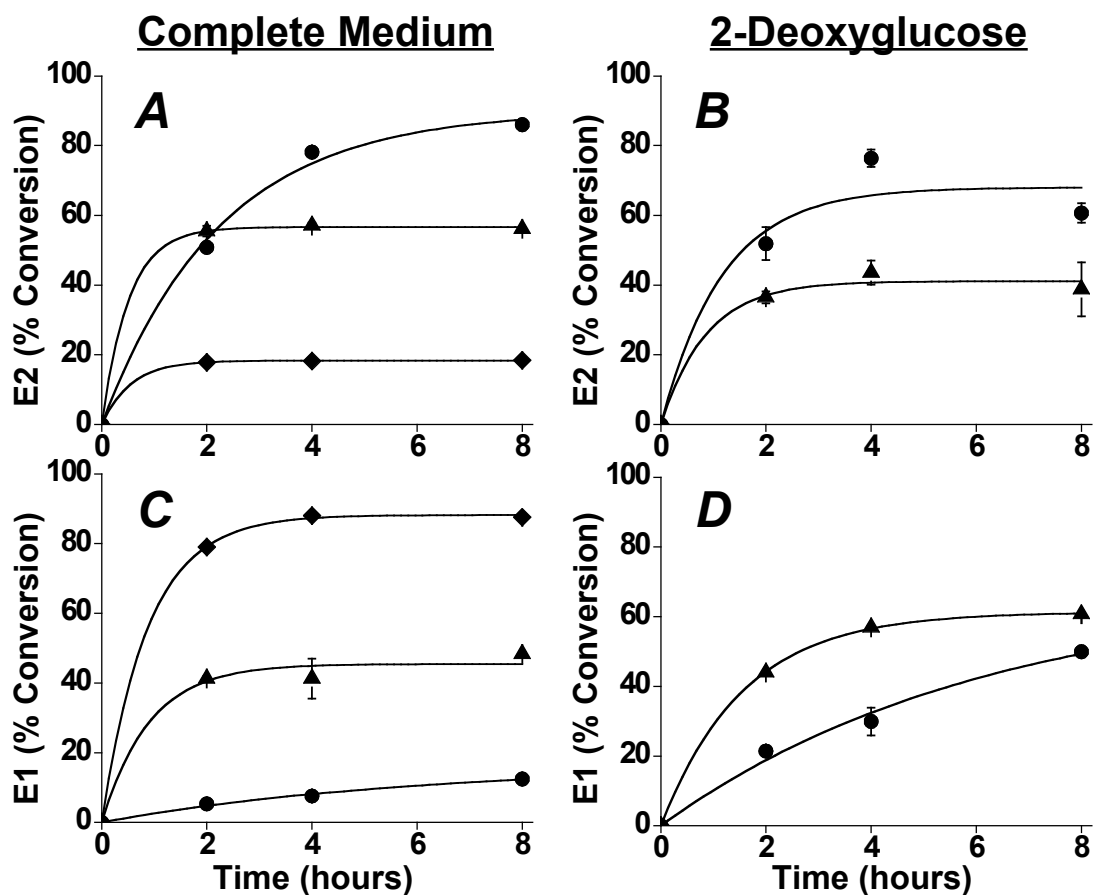

**Supplemental Data Figure 1.** E1 and E2 metabolism in CHOP cells expressing 17 $\beta$ HSD1 wild type (*circles*), mutation R38G (*triangles*), or mutation R38D (*diamonds*). Incubations in complete medium (A, E1 to E2; C, E2 to E1) and in glucose-free medium with 2-deoxyglucose (B, E1 to E2; D, E2 to E1) are shown. Data points are means  $\pm$  SD of three assays, and *curves* are best fits to the data:  $f(t) = A(1 - e^{-kt})$ . Equilibrium steroid distributions, derived by setting  $t = \infty$ , are summarized at the bottom of Table 1 ( $r^2 > 0.99$  except wild-type in B,  $r^2 = 0.95$ ).
