# Supplementary material
Source: PubMed Central journal article supplement (PMC2736091)
Supplement: en.2008-1817_4.pdf [file en.2008-1817_4.pdf]

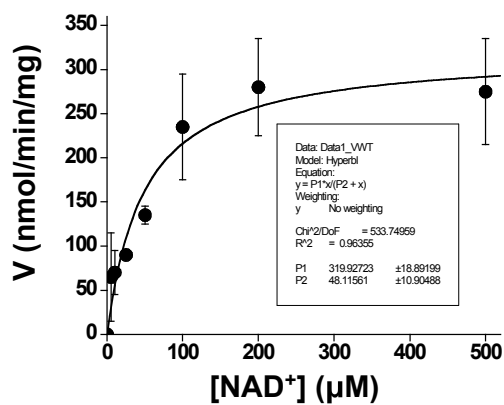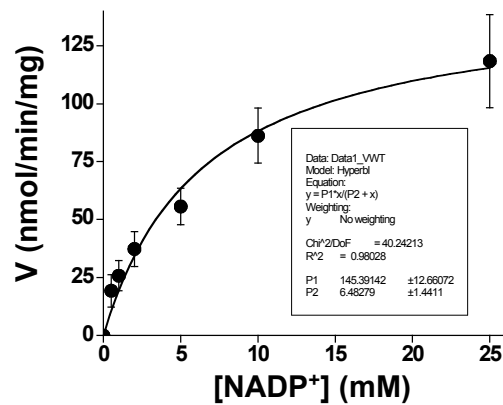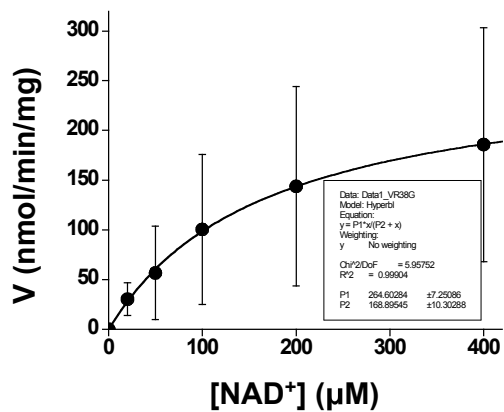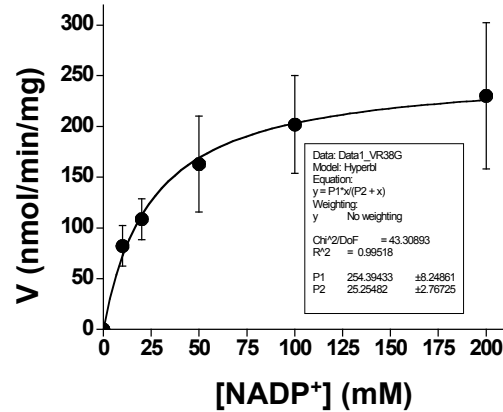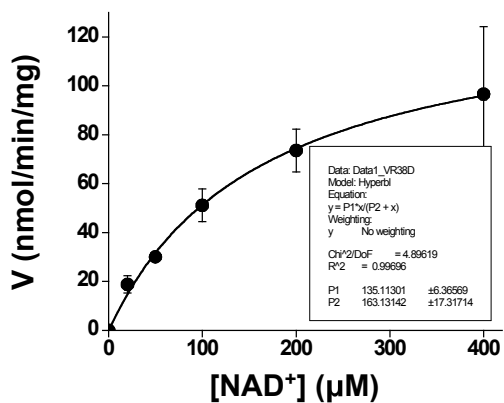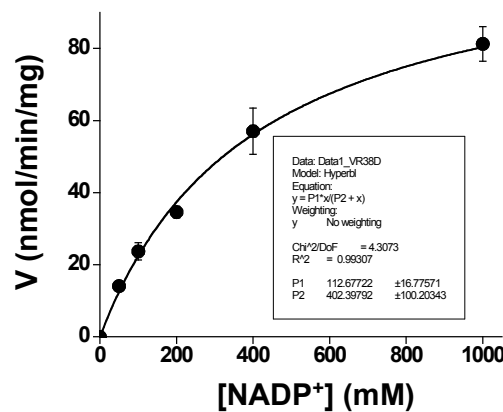

**Supplemental Data Figure 2.** V vs. [S] plots for E2 oxidation by purified 17βHSD1, wild-type and mutations R38G and R38D. Data points show means ± SD for a 3 or more determinations, and curves are fits of the Michaelis-Menten equation,  $V = V_{\max} \cdot [S] / (K_m + [S])$ , to the data using Origin version 7.5. Insets show fitting statistics ( $P1 = V_{\max}$ ,  $P2 = K_m$ ,  $r^2 > 0.96$  for all fits).
