# Supplementary material
Source: PubMed Central journal article supplement (PMC2736091)
Supplement: en.2008-1817_5.pdf [file en.2008-1817_5.pdf]

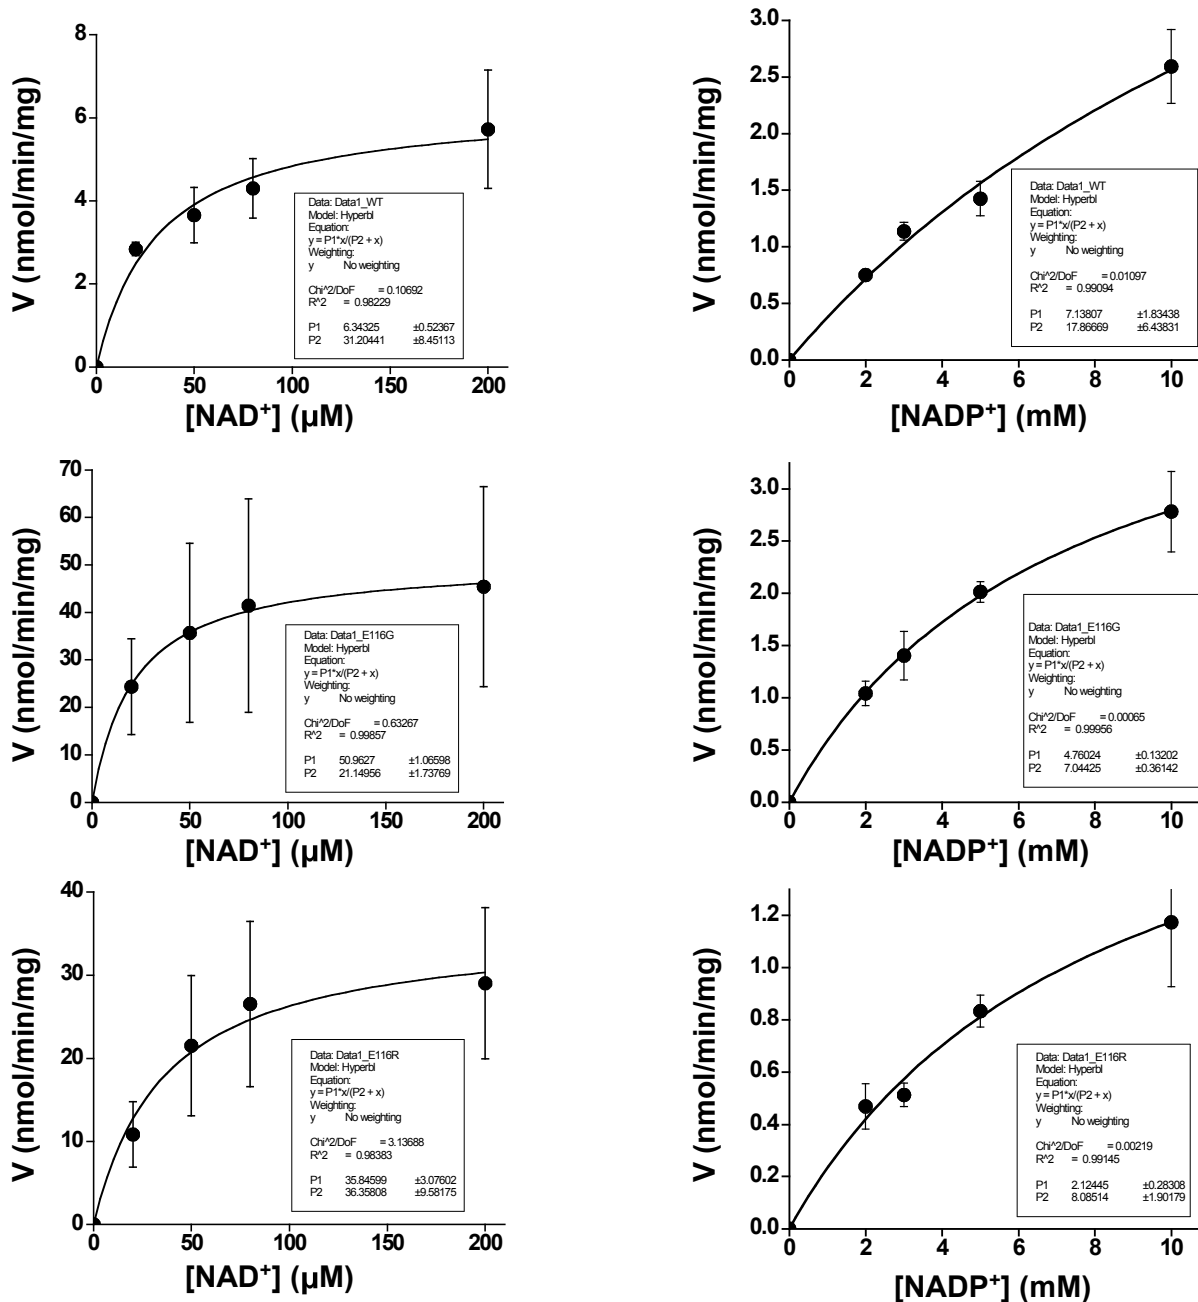

**Supplemental Data Figure 3.** V vs. [S] plots for E2 oxidation by yeast microsomes containing 17 $\beta$ HSD2, wild-type and mutations E116G and E116R. Data points show means  $\pm$  SD for a 3 or more determinations, and *curves* are fits of the Michaelis-Menten equation,  $V = V_{\max} \cdot [S] / (K_m + [S])$ , to the data using Origin version 7.5. Insets show fitting statistics (P1 =  $V_{\max}$ , P2 =  $K_m$ ,  $r^2 > 0.98$  for all fits).
